# Supplementary material for: Pathogenicity Islands in Uropathogenic Escherichia coli Clinical Isolate of the Globally Disseminated O25:H4-ST131 Pandemic Clonal Lineage: First Report from Egypt
Source: MDPI journal article supplement (doi:10.3390/antibiotics11111620), 2022-11-13
Supplement: s1 [file s1]

**Supplementary Table S1:** Assembly statistics generated through WGS of UPEC isolate EC14142 from Egypt.

|                           |           |
|---------------------------|-----------|
| Depth of coverage         | 218x      |
| Genome breadth (%)        | 99.2      |
| Number of reads           | 5,167,285 |
| Total length of sequences | 5,936,425 |
| Total number of contigs   | 296       |
| N50 (bp)                  | 85375     |
| GC (%)                    | 51.2      |
| CDSs                      | 4,728     |
| 5s, 16s, 23rrna           | 1, 1, 1   |
